# Supplementary material
Source: PubMed Central journal article supplement (PMC4274778)

SUPPLEMENTARY DATA

**Supplementary Figure 1.** Percent of Participants in the Internet Behavioral Intervention (IBI) and Internet Delivered Eating and Activity (IDEA) Control Condition by Category of Weight Change at 3 and 6 months. Weight loss categories are mutually exclusive.

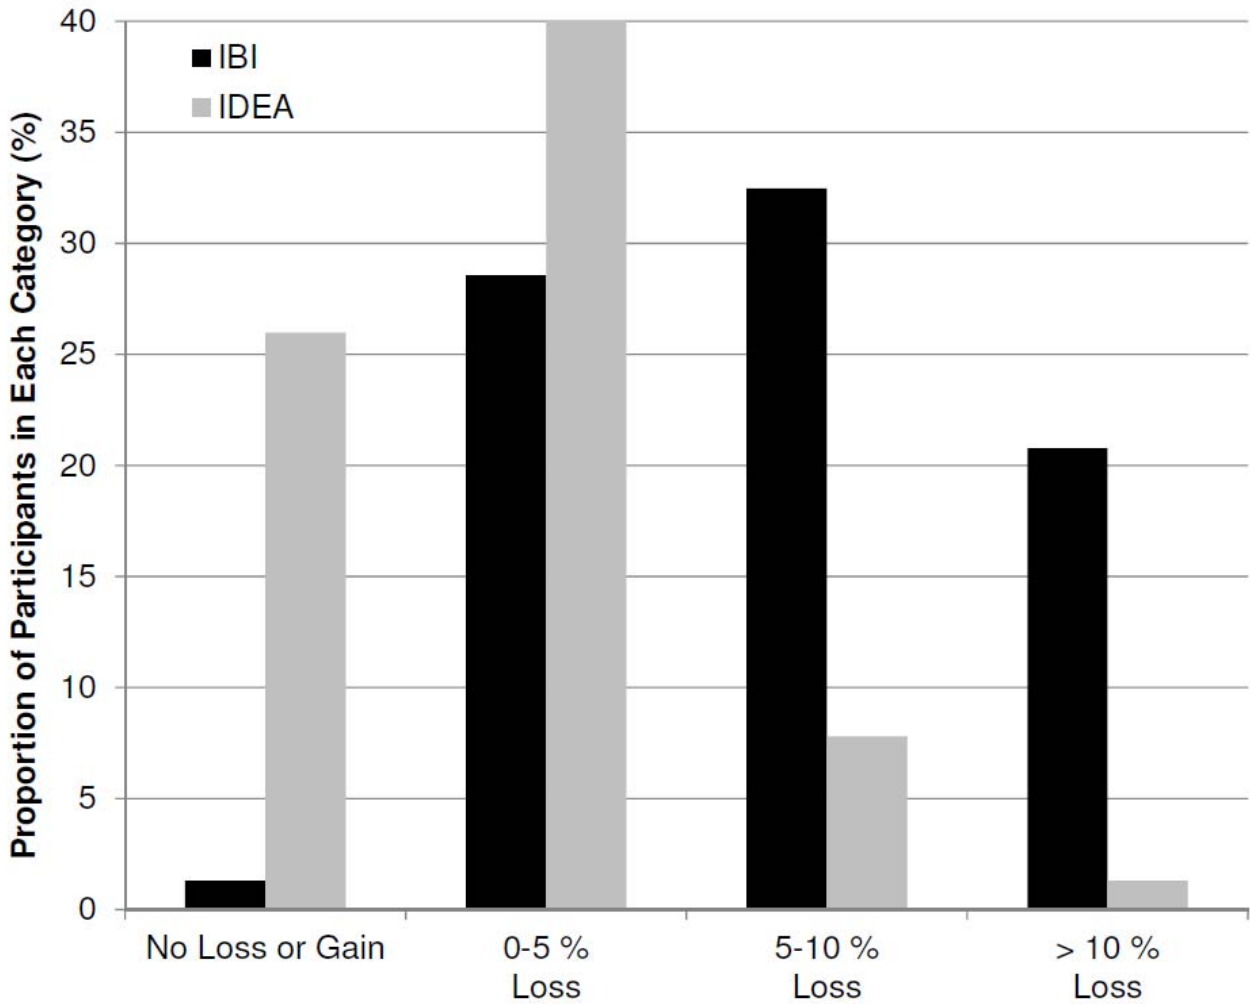

SUPPLEMENTARY DATA

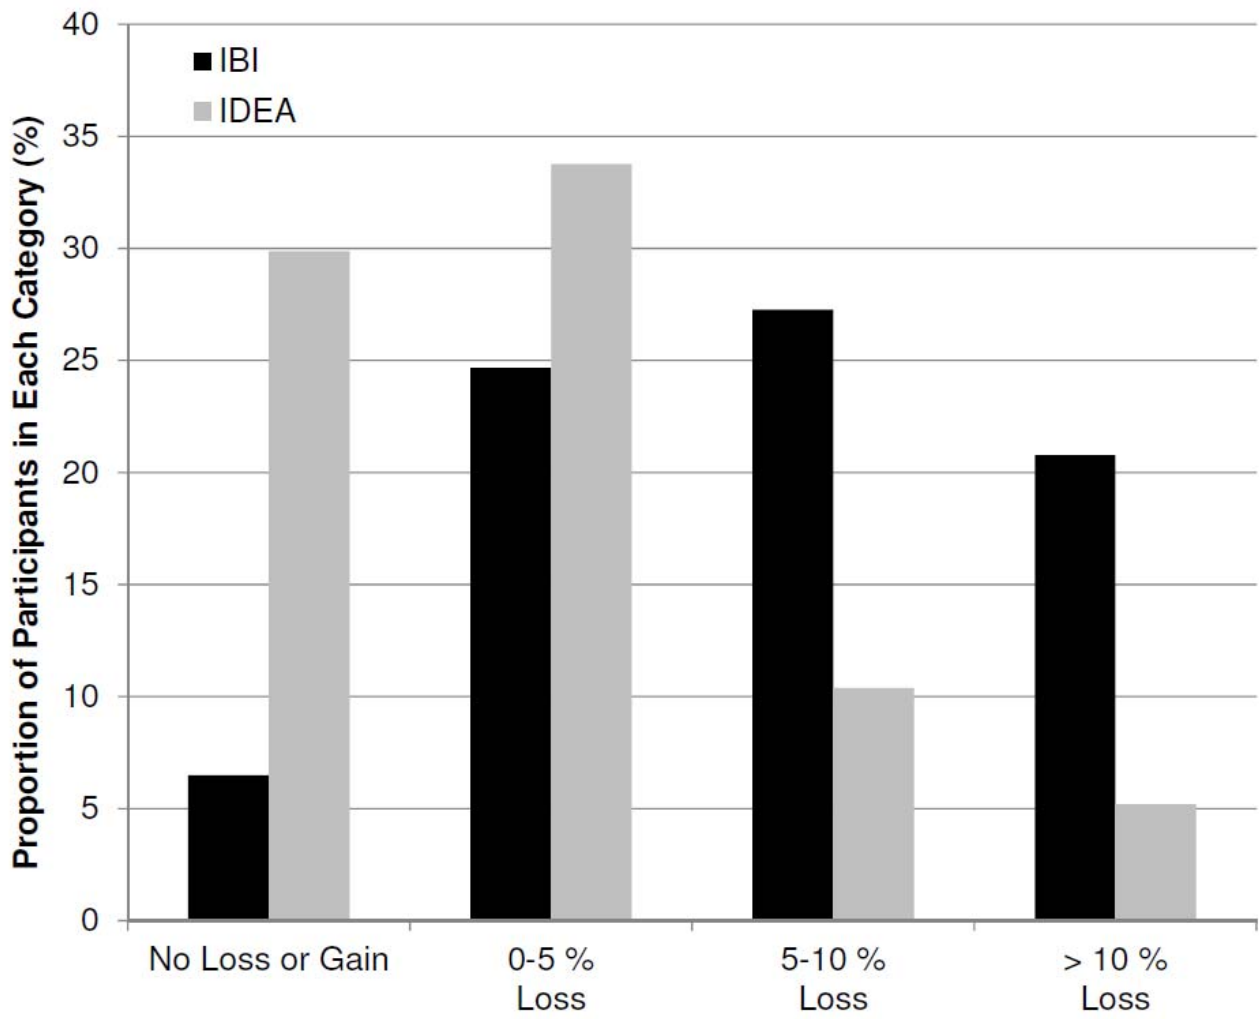

Supplement: supp_dc14-1474v141474_DC141474SupplementaryData.pdf [file supp_dc14-1474v141474_DC141474SupplementaryData.pdf]
